# Supplementary material
Source: publisher figshare collection journal article supplement (https://acs.figshare.com/ndownloader/files/4098406)
Supplement: Supplementary file 1 [file 4098406]

## Sheet: Tabelle1
Supplementary Table 6: Regulated proteins of HyaS3 vs. Hya (sulfating effect).
* no value if quantified in 2 of the 3 replicates
IPI number	Protein names	Log2(H/L)	t-Test*
		mean ± SD
Cytoskeleton (Fold enrichment: 1.5)
IPI00178352	Filamin C	-0.81 ± 0.14	0.01
IPI00027341	Actin regulatory protein CAP-G	-0.58 ± 0.09	0.01
IPI00307162	Vinculin	0.51 ± 0.07
IPI00473014	Destrin	0.53 ± 0.15
IPI00013475	Tubulin beta-2A chain	0.53 ± 0.12
IPI00019502	Myosin heavy chain 9	0.58 ± 0.25
IPI00220709	Tropomyosin-2 (beta)	0.62 ± 0.10	0.01
IPI00910593	Calponin-2	0.63 ± 0.25
IPI00010414	C-terminal LIM domain protein 1	0.64 ± 0.16	0.03
IPI00790503	Myosin heavy chain 10	0.70 ± 0.18
IPI00216135	Tropomyosin alpha-1 chain	0.72 ± 0.25
IPI00856045	Protein AHNAK2	0.74 ± 0.19
IPI00910712	Highly similar to Homo sapiens tropomyosin 2 (beta)	0.84 ± 0.31
IPI00216138	Transgelin	0.91 ± 0.21	0.03
IPI00216975	Tropomyosin-4	0.92 ± 0.20	0.02
IPI00220278	Myosin regulatory light chain 9	0.94 ± 0.07	0
IPI00023006	Actin, alpha cardiac muscle 1	1.07 ± 0.35	0.05
IPI00604537	Tropomyosin 1	1.31 ± 0.55
IPI00021264	Calponin-1	2.02 ± 0.23	0.01
Cell Adhesion/GTPase(Fold enrichment: 1.3)
IPI00012442	Ras GTPase-activating protein-binding protein 1	-0.66 ± 0.06
IPI00910513	Eukaryotic peptide chain release factor GTP-binding subunit ERF3B	-0.63 ± 0.03
IPI00219825	Prosaposin	0.74 ± 0.28
IPI00060423	Collagen triplehelix repeat-containing protein 1	-1.12 ± 0.39	0.04
IPI00884105	Lysosome-associated membrane glycoprotein 1	0.89 ± 0.40
IPI00216172	Lysosome-associated membrane glycoprotein 2	0.77 ±0.35
IPI00004839	Crk-likeprotein	-0.60 ± 0.04
IPI00022418	Anastellin	-0.57 ± 0.43
IPI00021831	Tissue-specific extinguisher 1	0.56 ± 0.13
IPI00470559	Ankyrin repeat domain-containing protein 25	0.72 ± 0.11
IPI00237884	Gravin	0.95 ± 0.35
IPI00015148	Ras-related protein Rap-1b	1.15 ± 0.50
IPI00027107	Elongation factor Tu, mitochondrial	1.24 ± 0.72
IPI00027505	Integrin alpha-V	1.74 ± 0.05
Stress(Fold enrichment: 2.2)
IPI00641582	BAG family molecular chaperone regulator 3	-0.80 ± 0.22
IPI00156689	Synaptic vesicle membrane protein VAT-1 homolog	0.51 ± 0.14
IPI00465436	Catalase	0.64 ± 0.11
IPI00793199	Annexin A4	0.79 ± 0.36
IPI00216308	Voltage-dependent anion-selective channel protein 1	1.24 ± 1.09
IPI00910977	3-mercaptopyruvate sulfur transferase variant	0.66 ± 0.01
IPI00220362	10 kDa heatshock protein, mitochondrial	0.74 ± 0.59
IPI00221234	Aldehyde dehydrogenase family 7 member A1	0.78 ± 0.17	0.02
IPI00024919	Peroxiredoxin III	0.88 ± 0.14
IPI00784154	60 kDa heatshock protein, mitochondrial	0.98 ± 0.56
IPI00219381	NADH-ubiquinone oxidoreductase B8 subunit	1.04 ± 0.34
IPI00021785	Cytochrome c oxidase polypeptide Vb	1.75 ±0.11
IPI00029733	Aldo-ketoreductase family 1 member C1	-1.50 ± 0.73
IPI00003128	Procollagen-proline	-0.73 ± 0.30
IPI00413641	Aldo-ketoreductase family 1 member B1	-0.52 ± 0.08	0.01
IPI00027223	Isocitrate dehydrogenase [NADP] cytoplasmic	0.59 ± 0.04	0
IPI00291006	Malate dehydrogenase, mitochondrial	0.67 ± 0.50
IPI00019912	17-beta-hydroxysteroid dehydrogenase 4	0.79 ± 0.45
IPI00008982	Aldehyde dehydrogenase family 18 member A1	1.10 ± 0.09
IPI00017726	17-beta-hydroxysteroid dehydrogenase 10	1.18 ± 0.59
IPI00003925	Pyruvatedehydrogenase E1 componentsubunitβ	1.34 ± 0.31	0.03
IPI00375676	Ferritin	0.56 ± 0.59
IPI00298308	Aldehyde dehydrogenase family 1 member L2	1.90 ± 0.01
IPI00926925	OGDH protein	1.96 ± 0.03
IPI00103467	Aldehyde dehydrogenase 5	2.56 ± 0.82
IPI00009634	Sulfide: quinone oxidoreductase, mitochondrial	2.59 ± 0.37
Metabolism (Fold enrichment: 1.5)
IPI00018246	Hexokinase type I	0.86 ± 0.21
IPI00383581	Alpha-glucosidase 2	0.77 ± 0.23	0.04
IPI00021807	Acid beta-glucosidase	-0.84 ± 0.17	0.02
IPI00170935	Leucine-rich repeat-containing protein 47	-1.49 ± 1.06
IPI00815732	Putative uncharacterized protein DKFZp781N1372	-0.80 ± 0.41
IPI00465361	Ribosomal protein L13	-0.74 ± 0.72
IPI00010105	B4 integrin interactor	-0.73 ± 0.11	0.01
IPI00419979	Gamma-PAK	-0.67 ± 0.16	0.03
IPI00017184	EH domain-containing protein 1	0.54 ± 0.11
IPI00376798	Cell growth-inhibiting protein 34	-0.62 ± 0.37
IPI00215790	60S ribosomal protein L38	-0.62 ± 0.00
IPI00927658	60S ribosomal protein L32	-0.58 ± 0.04
IPI00893918	Valine-tRNAligase	-0.56 ± 0.06
IPI00783097	Glycine-tRNAligase	-0.53 ± 0.15	0.04
IPI00221091	40S ribosomal protein S15a	0.67 ± 0.54
IPI00027681	Nicotinamide N-methyltransferase	0.68 ± 0.32
IPI00008433	40S ribosomal protein S5	0.69 ± 0.02	0
IPI00219526	Glucose phosphomutase 1	0.91 ± 0.12	0.01
IPI00013296	Ribosomal protein S18	0.93 ± 0.59
IPI00031691	Ribosomal protein L9	0.93 ± 0.01
IPI00465256	Adenylatekinase 3	1.04 ± 0.16
IPI00002520	Glycinehydroxymethyltransferase	1.13 ± 0.49
IPI00020632	Argininosuccinate synthase	1.18 ± 0.20	0.01
IPI00030363	Acetoacetyl-CoA thiolase	1.29 ± 0.90
IPI00022793	Acetyl-CoA acyltransferase	1.34 ± 0.72
Other
IPI00007611	ATP synthase subunit O, mitochondrial	0.87 ± 0.32
IPI00418169	Annexin A2	0.62 ± 0.68
IPI00329801	Annexin A5	0.66 ± 0.15
IPI00221226	Annexin A6	1.10 ± 0.66
IPI00018931	Vacuolar protein sorting-associated protein 35	0.68 ± 0.06
IPI00397571	UBX domain-containing protein 2C	-0.53 ± 0.16	0.04
IPI00396331	Bone marrow zincfinger 2	-12.81 ± 1.87	0.01
IPI00334587	APOBEC1-binding protein 1	-0.80 ± 0.08
IPI00001734	Phosphoserine aminotransferase	-0.68 ± 0.42
IPI00017617	DEAD box protein 5	-0.65 ± 0.10
IPI00260715	Oncogene FUS	-0.63 ± 0.11	0.02
IPI00171903	ORF protein	-0.59 ± 0.12	0.02
IPI00940950	Ribosomal protein L10	-0.55 ± 0.02
IPI00291764	Histone H2A type 1	0.53 ± 0.23
IPI00440493	ATP synthase subunit alpha 1, mitochondrial	1.32 ± 0.77
IPI00303476	ATP synthase subunit beta, mitochondrial	1.42 ± 0.70
IPI00646240	Histone H2B	0.84 ± 0.20	0.03
IPI00169285	LAMA-like protein 2	0.85 ± 0.20	0.03
IPI00100775	UPF0366 protein C11orf67	1.16 ± 0.01
IPI00013912	Uncharacterized protein C1orf198	1.28 ± 0.09	0
IPI00217465	Histone H1.2	1.33 ± 0.58
IPI00217468	Histone H1.5	1.87 ± 0.03
